# Supplementary material
Source: PubMed Central journal article supplement (PMC8136882)
Supplement: koaa048_supplementary_data.pdf [file koaa048_supplementary_data.pdf]

**Supplemental Table 1.** Wu and Bock (2021). The Plant Cell. Control of retrograde signaling by GUNs.List of genes mentioned in the review. All of those listed are from *Arabidopsis thaliana*, with the exception of HvCMF7 from *Hordeum vulgare*.

| Gene name        | Full name                                                        | Other acronym | AgI ID                       |
|------------------|------------------------------------------------------------------|---------------|------------------------------|
| <i>GUN1</i>      | GENOMES UNCOUPLED1                                               |               | At2g31400                    |
| <i>GUN2</i>      | GENOMES UNCOUPLED2                                               | HY1           | At2g26670                    |
| <i>GUN3</i>      | GENOMES UNCOUPLED3                                               | HY2           | At3g09150                    |
| <i>GUN4</i>      | GENOMES UNCOUPLED4                                               |               | At3g59400                    |
| <i>GUN5</i>      | GENOMES UNCOUPLED5                                               |               | At5g13630                    |
| <i>GUN6</i>      | GENOMES UNCOUPLED6                                               | FC1           | At5g26030                    |
| <i>ABI4</i>      | ABSCISIC ACID INSENSITIVE4                                       |               | At2g40220                    |
| <i>accD</i>      | ACETYL-COA CARBOXYLASE CARBOXYL TRANSFERASE SUBUNIT BETA         |               | AtCg00500                    |
| <i>CCR2</i>      | CAROTENOID CHLOROPLAST REGULATION2                               |               | At1g06820                    |
| <i>CHLD</i>      | CHLD subunit of magnesium chelatase                              | ALB1          | At1g08520                    |
| <i>CHL1</i>      | CHL1 subunit of magnesium chelatase                              | CH42, CS      | At4g18480                    |
| <i>Clp</i>       | CLP PROTEASE (CASEINOLYTIC PROTEASE)                             |               | multisubunit protein complex |
| <i>ClpB3</i>     | CASEINOLYTIC PROTEINASE SUBUNIT B3                               | APG6          | At5g15450                    |
| <i>ClpC1</i>     | CLPC HOMOLOGUE 1                                                 | HSP93-V       | At5g50920                    |
| <i>clpP1</i>     | CASEINOLYTIC PROTEASE CATALYTIC SUBUNIT 1                        |               | AtCg00670                    |
| <i>ClpR1</i>     | CLP PROTEASE NON-PROTEOLYTIC SUBUNIT 1                           | SVR2          | At1g49970                    |
| <i>cpHSC70</i>   | CHLOROPLAST HEAT SHOCK PROTEIN 70-1                              |               | At4g24280                    |
| <i>cpHSC70-2</i> | CHLOROPLAST HEAT SHOCK PROTEIN 70-2                              |               | At5g49910                    |
| <i>CPN60</i>     | chloroplasts chaperonins                                         |               | several genes                |
| <i>DXS</i>       | deoxyxylulose 5-phosphate synthase                               | CLA           | At4g15560                    |
| <i>FC2</i>       | FERROCHELATASE2                                                  |               | At2g30390                    |
| <i>FUG1</i>      | FU-GAERI1                                                        |               | At1g17220                    |
| <i>GLK1</i>      | GOLDEN2-LIKE 1                                                   |               | At2g20570                    |
| <i>HSP90</i>     | HEAT SHOCK PROTEIN 90                                            |               | several genes                |
| <i>LHCA4</i>     | LIGHT-HARVESTING CHLOROPHYLL-PROTEIN COMPLEX I SUBUNIT A4        | CAB4          | At3g47470                    |
| <i>LHCB</i>      | LIGHT HARVESTING CHLOROPHYLL A/B BINDING PROTEIN                 |               | several genes                |
| <i>MORF2</i>     | MULTIPLE ORGANELLAR RNA EDITING FACTOR2                          |               | At2g33430                    |
| <i>MORF9</i>     | MULTIPLE ORGANELLAR RNA EDITING FACTOR9                          |               | At1g11430                    |
| <i>NCP</i>       | NUCLEAR CONTROL OF PEP ACTIVITY                                  |               | At2g31840                    |
| <i>PAP7</i>      | plastid-encoded RNA polymerase-associated protein 7              | pTAC14        | At4g20130                    |
| <i>PAP8</i>      | plastid-encoded RNA polymerase-associated protein 8              | pTAC6         | At1g21600                    |
| <i>PBGD</i>      | porphobilinogen deaminase                                        | HEMC          | At5g08280                    |
| <i>PPI1</i>      | PLASTID PROTEIN IMPORT 1                                         | TOC33         | At1g02280                    |
| <i>PPI2</i>      | PLASTID PROTEIN IMPORT 2                                         | TOC159        | At4g02510                    |
| <i>PRIN2</i>     | PLASTID REDOX INSENSITIVE2                                       |               | At1g10522                    |
| <i>PRORS1</i>    | PROLYL-TRNA SYNTHETASE 1                                         | OVA6          | At5g52520                    |
| <i>PRPL11</i>    | PLASTID RIBOSOMAL PROTEIN L11                                    |               | At1g32990                    |
| <i>PRPL24</i>    | PLASTID RIBOSOMAL PROTEIN L24                                    | SVR8          | At5g54600                    |
| <i>PRPS1</i>     | PLASTID RIBOSOMAL PROTEIN S1                                     |               | At5g30510                    |
| <i>PRPS17</i>    | PLASTID RIBOSOMAL SMALL SUBUNIT PROTEIN 17                       |               | At1g79850                    |
| <i>psbD</i>      | PHOTOSYSTEM II REACTION CENTER PROTEIN D                         |               | AtCg00270                    |
| <i>PTM</i>       | PHD TYPE TRANSCRIPTION FACTOR WITH TRANSMEMBRANE DOMAINS         |               | At5g35210                    |
| <i>RBCS</i>      | RUBISCO SMALL SUBUNIT                                            |               | several genes                |
| <i>RCB</i>       | REGULATOR OF CHLOROPLAST BIOGENESIS                              | SVR4          | At4g28590                    |
| <i>rpo</i>       | Plastid DNA-dependent RNA polymerase (plastid encoded)           |               | multisubunit protein complex |
| <i>RpoTp</i>     | Plastid DNA-dependent RNA polymerase (nucleus encoded)           | SCA3          | At2g24120                    |
| <i>SG1</i>       | SLOW GREEN 1                                                     |               | At3g18420                    |
| <i>SICY192</i>   | SUGAR INDUCIBLE COTYLEDON YELLOW 192                             |               | At5g22510                    |
| <i>SIG2</i>      | SIGMA FACTOR 2                                                   |               | At1g08540                    |
| <i>SIG5</i>      | SIGMA FACTOR 5                                                   |               | At5g24120                    |
| <i>SIG6</i>      | SIGMA FACTOR 6                                                   |               | At2g36990                    |
| <i>TIC40</i>     | TRANSLOCON AT THE INNER ENVELOPE MEMBRANE OF CHLOROPLASTS 40     |               | At5g16620                    |
| <i>TOC75-III</i> | TRANSLOCON AT THE OUTER ENVELOPE MEMBRANE OF CHLOROPLASTS 75-III |               | At3g46740                    |
| <i>UROD2</i>     | uroporphyrinogen III decarboxylase                               | HEME2         | At2g40490                    |
| <i>VAR1</i>      | VARIEGATED 1                                                     | FTSH5         | At5g42270                    |
| <i>VAR2</i>      | VARIEGATED 2                                                     | FTSH2         | At2g30950                    |
| <i>CIA2</i>      | CHLOROPLAST IMPORT APPARATUS 2                                   |               | At5g57180                    |
| <i>HvCMF7</i>    | CONSTANS, CO-LIKE, and TOC1 (CCT) MOTIF FAMILY 7                 | ALBOSTRIANS   | MLOC_670 (IBSC)              |
